# Supplementary material for: Kinesin-5 regulates the growth of the axon by acting as a brake on its microtubule array
Source: PubMed Central journal article supplement — J Cell Biol. 2007 Sep 10;178(6):1081–91. doi: 10.1083/jcb.200702074 (PMC2064629; doi:10.1083/jcb.200702074), 2007-09-10
Supplement: jcellbiol_jcb.200702074_2.pdf [file jcellbiol_jcb.200702074_2.pdf]

## Supplemental materials

Myers et al., <http://www.jcb.org/cgi/content/full/jcb.200702074/DC1>

### Immunological techniques

Neuronal cultures were fixed by incubation for 15 min at room temperature with  $1 \times$  PEM (80 mM PIPES, 5 mM EGTA, and 1 mM  $MgCl_2$ , pH 6.8) containing 0.3% glutaraldehyde. Cells were then rinsed extensively in PBS, pH 7.4, further permeabilized by incubation with 0.2% Triton X-100 in PBS for 15 min, and treated twice with 10 mg/ml sodium borohydride in PBS, 15 min each time, to quench glutaraldehyde-related autofluorescence. Samples were blocked by incubation for 30 min with 10 mg/ml BSA + 10% normal goat serum in PBS and incubated with primary antibodies (rabbit anti-GFP at 1:2,000), diluted in PBS, kept overnight at 4°C, rinsed extensively with PBS, and reblocked for 60 min before being incubated in secondary antibodies (goat anti-rabbit Alexa-488 at 1:200; Invitrogen) and diluted in PBS for 1 h at 37°C. After extensive rinsing in PBS, samples were mounted in a medium that reduces photobleaching (0.212% N-propylgallate in 90% glycerol and 10% PBS).

All imaging studies were performed (and images were acquired) using equipment previously described (Hasaka, T.P., K.A. Myers, and P.W. Baas. 2004. *J. Neurosci.* 24:11291–11301) with either a Plan Aplanachromat or Fluor 100 $\times$ /1.30 oil objective (Carl Zeiss Microimaging, Inc.). Fluorescence intensity and surface area were calculated using the “measure/outline” application of Axiovision 4.5 or Axiovision LE (Carl Zeiss Microimaging, Inc.).

### Western blot analysis

Cultured neuronal lysate was collected in 1.5 ml of ice-cold PBS ( $1 \times$ ), dissolved in sample buffer, resolved in 7.5% (for kinesin-5) and 15% (for GAPDH) SDS-PAGE gels, and transferred onto nitrocellulose membranes overnight at 4°C (25–30 mA). Transfers were probed for kinesin-5 (Kress Eg5 antibody at 1:500; secondary HRP at 1:2,000 [Pierce Chemical Co.]) and GAPDH (anti-GAPDH Ab at 1:500 [Ambion]; secondary HRP at 1:1000 [Pierce Chemical Co.]). Antibody chemiluminescence detection used ECL reagents (Pierce Chemical Co.).

### Vesicle and mitochondrion transport assays

To analyze vesicle transport, rhodamine-dextran (~10,000 mol wt; Sigma-Aldrich) was added into culture medium at 1 mg/ml the night before imaging. 15 min prior to imaging, cultures were rinsed and replaced with L15 medium supplemented with 5% FBS. A total of 300 time-lapse images were taken at 400-ms exposure at 1-s intervals for each axon. Each dish was imaged for no longer than 60 min. 200 sequence frames were analyzed using the “measure/length” application in Axiovision 4.5 for calculating distance moved for each successive movie frame.

For mitochondrion transport analysis, MitoTracker FM (Invitrogen) was added onto culture medium at 5 nM final concentration for 45 min. Cells were then rinsed and replaced with L15 medium supplemented with 5% FBS. A total of 211 time-lapse images were taken at 75–120-ms exposure at 2-s intervals. Data analysis was performed as described for the vesicle transport assay.

### Statistical analysis and image processing

All data analysis, statistical comparisons, and graphs were generated using Excel software (Microsoft Corp.). Data comparison was performed using a two-tailed *t* test assuming unequal variances for axonal morphology experiments and  $\chi^2$  analysis was used for statistical comparison of frequency data as well as for changes in stepwise data distribution. For all statistical analysis, significance was determined to 95% confidence interval ( $P < 0.05$ ). Image processing was performed using Axiovision 4.0 and final figure processing was performed with Photoshop 7.0 (Adobe).
